# Supplementary material for: Platination of full length tRNAAla and truncated versions of the acceptor stem and anticodon loop
Source: Royal Society of Chemistry journal article supplement (doi:10.1039/b719542g), 2008-01-01
Supplement: b719542g.pdf [file b719542g.pdf]

## Platination of full length tRNA<sup>Ala</sup> and truncated versions of the acceptor stem and anticodon loop

Pal Papsai,<sup>a</sup> Åse Sykfont Snygg,<sup>a</sup> Jasmin Aldag,<sup>a</sup> Sofi Karin Cecilia Elmroth<sup>\*,a</sup>

**Table S1.** Observed rate constants and the corresponding apparent first half-lives for the reactions of d(T<sub>7</sub>GGT<sub>7</sub>), sMh<sup>Ala</sup> and acMh<sup>Ala</sup> with cisplatin<sup>a,b,c</sup>

| oligonucleotide                     | $10^4 \times k_{\text{obs}} / \text{s}^{-1}$ | $t_{1/2, \text{app}} / \text{h}$ |
|-------------------------------------|----------------------------------------------|----------------------------------|
| d(T <sub>7</sub> GGT <sub>7</sub> ) | $0.66 \pm 0.09$                              | 3.9                              |
| sMh <sup>Ala</sup>                  | $1.2 \pm 0.3$                                | 2.6                              |
| acMh <sup>Ala</sup>                 | $1.7 \pm 0.2$                                | 2.1                              |

<sup>a</sup>[cisplatin] =  $2.0 \times 10^{-4}$  M, [DNA, RNA] =  $4.0 \times 10^{-6}$  M.

<sup>b</sup>MOPS buffer pH 6.1, 37 °C, [Na<sup>+</sup>] = 140 mM, [Mg<sup>2+</sup>] = 2.0 mM.

<sup>c</sup> $t_{1/2, \text{app}} = 60 + \ln 2 / k_{\text{obs}}$ .

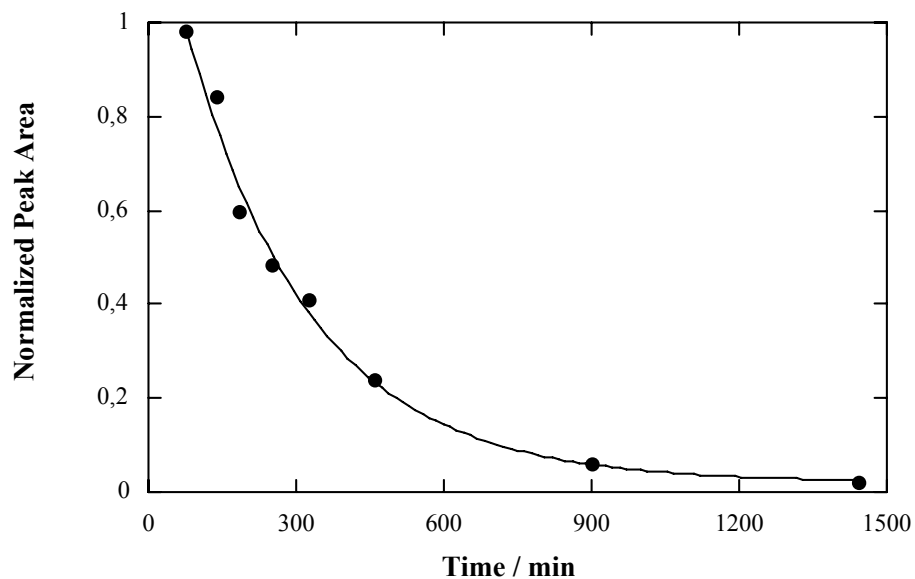

**Fig S1.** Fit of a single exponential function to the normalized, integrated peak areas vs. time for unplatinated d(T<sub>7</sub>GGT<sub>7</sub>) after exposure to cisplatin. Reaction conditions: [cisplatin] =  $2.0 \times 10^{-4}$  M, [DNA] =  $4.0 \times 10^{-6}$  M, pH 6.1, 37 °C, [Na<sup>+</sup>] = 140 mM, [Mg<sup>2+</sup>] = 2.0 mM.
